# Supplementary material
Source: Elsevier journal article supplement (https://www.sciencedirect.com/science/article/pii/S1413867016306171)

**Suppl. Fig. 1.** Haematoxylin-eosin stained sections of kidney. (A): Control mice without infection, (B) After 60th days post infection, (C) After 90th days post infection. At 60th day, the section shows higher cellularity (red arrow) and reduced bowman space (yellow arrow) in comparison to kidney of non-infected control. The cellularity was decreased and Bowman’s space did not changed post 90th day.


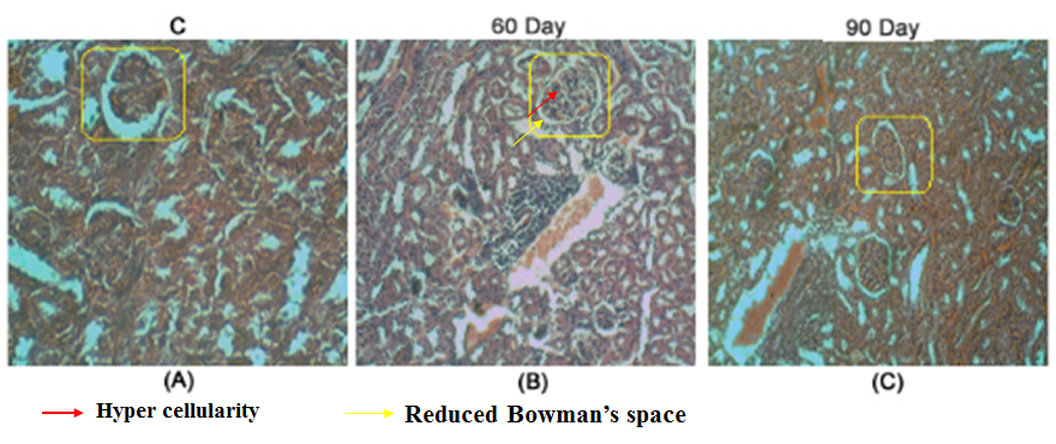

Supplement: mmc1 [file S1413867016306171:mmc1.docx]
